# Supplementary material for: Evaluating the efficacy of a priming dose of cyclophosphamide prior to pembrolizumab to treat metastatic triple negative breast cancer
Source: HighWire-hosted journal article supplement (doi:10.1136/jitc-2021-003427), 2022-02-01
Supplement: jitc-2021-003427supp001_data_supplement.pdf [file jitc-2021-003427supp001_data_supplement.pdf]

## Supplementary Data

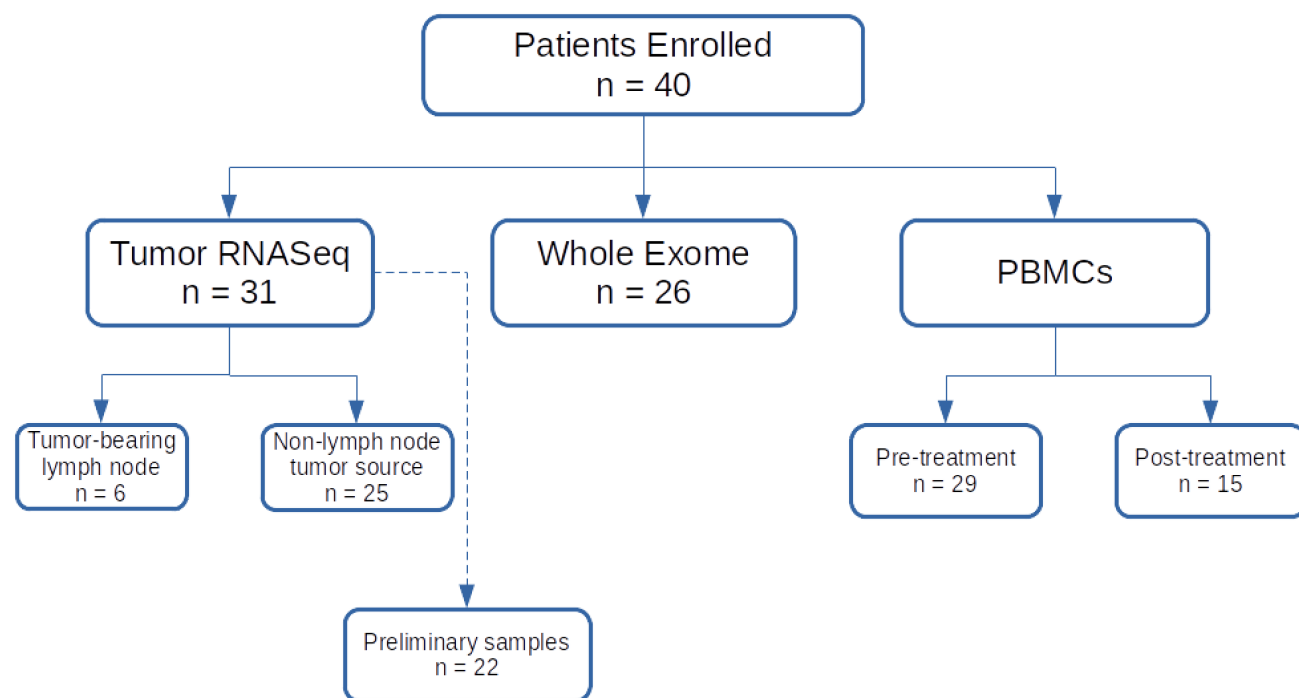

### Supplementary Figure 1: Study sample collection counts.

Samples listed by data type, optionally further divided by collection time point or clinical attribute.

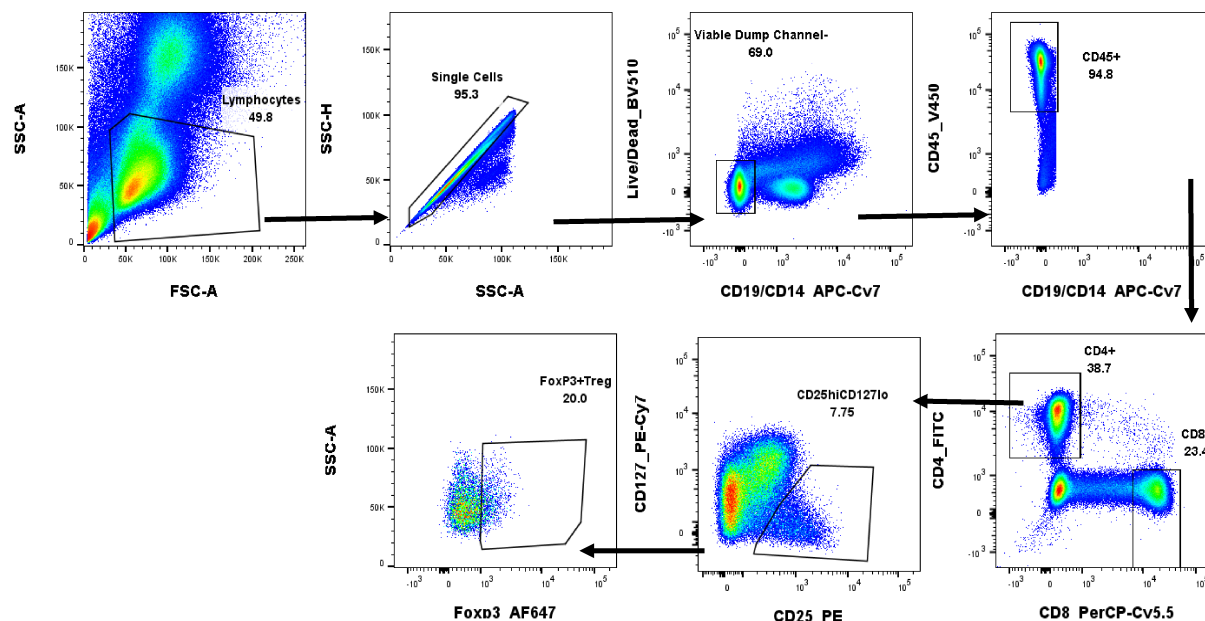

### Supplementary Figure 2: Demonstration of gating strategies for T<sub>reg</sub> flow cytometry analyses.

The first row shows how viable CD45+ PBMCs were selected from a bulk population (from left to right). The second row demonstrates sorting of CD45+ PBMCs into CD4+ and CD8+ T cells, where CD25hiCD127low and FoxP3+ (2nd row) subsets were subsequently detected within CD4+ T cells.

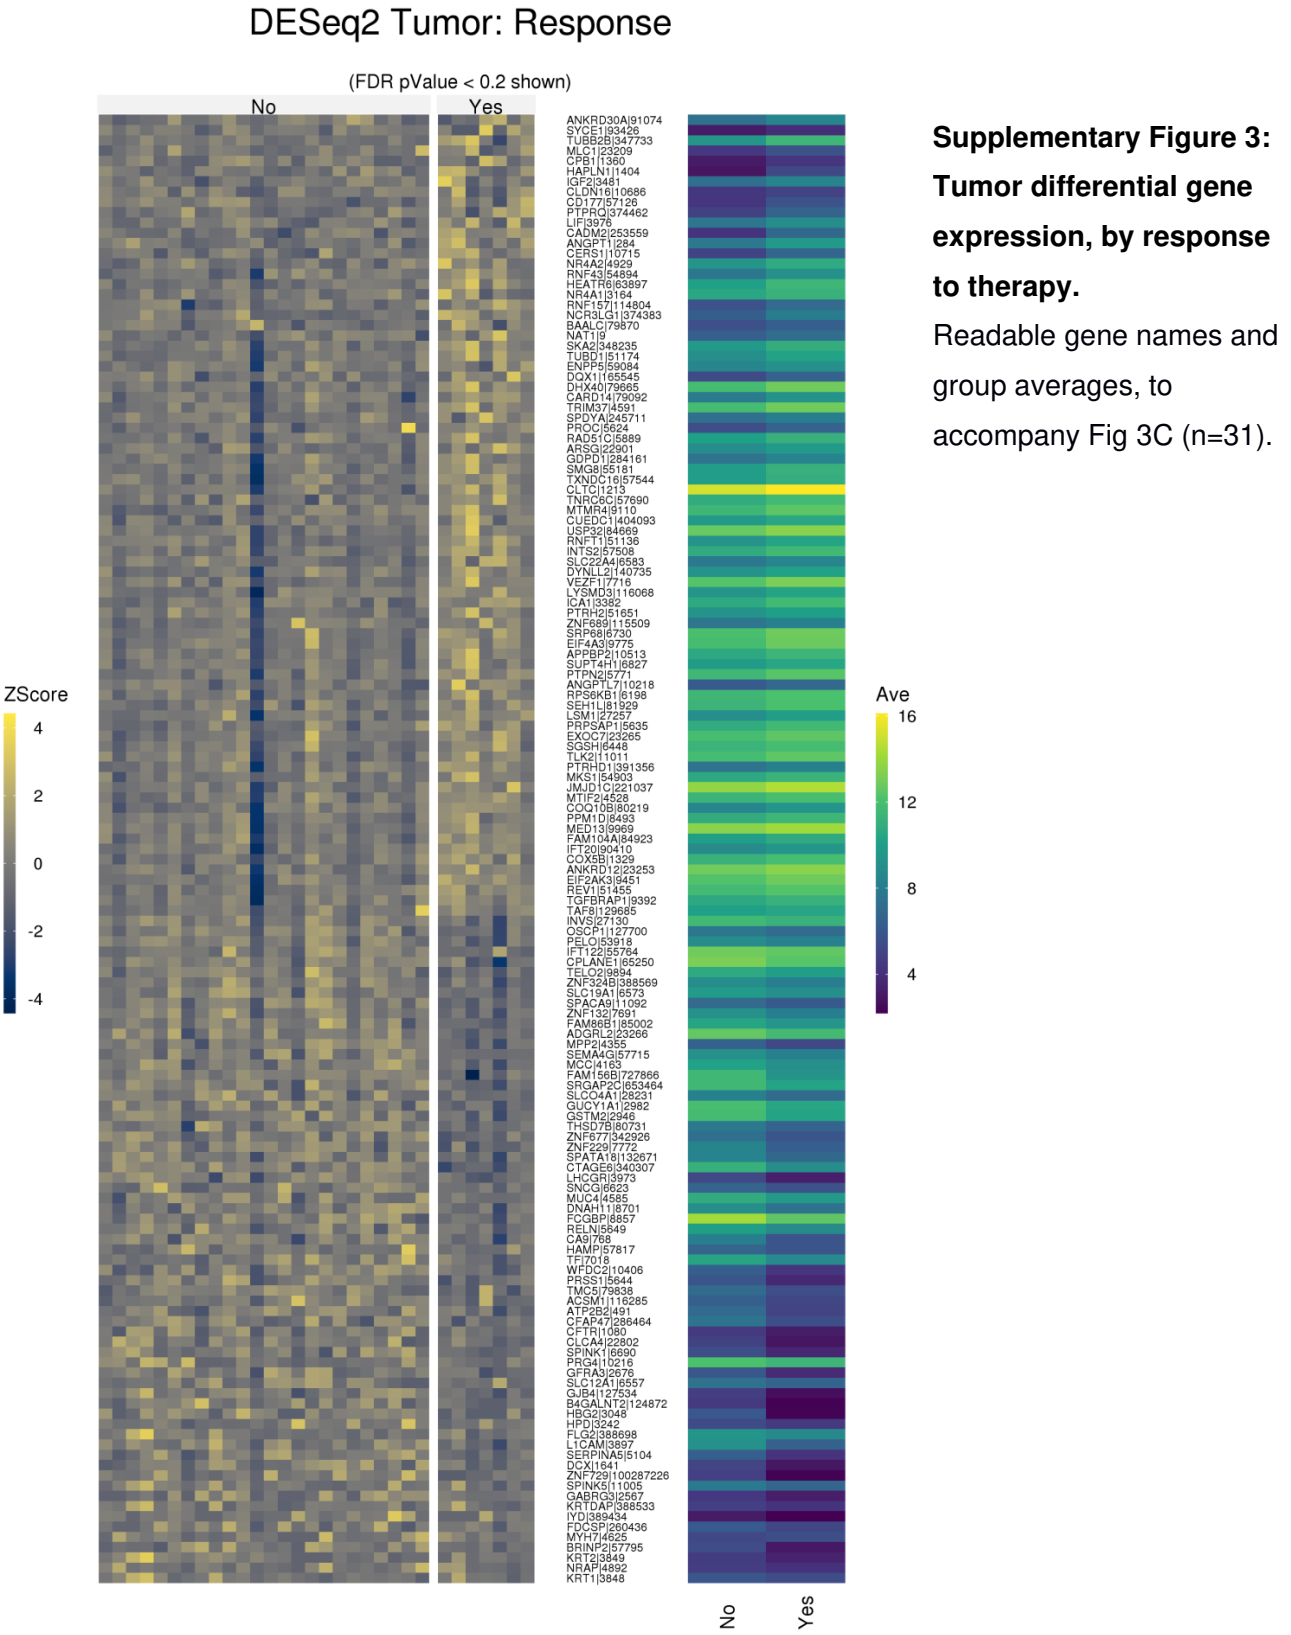

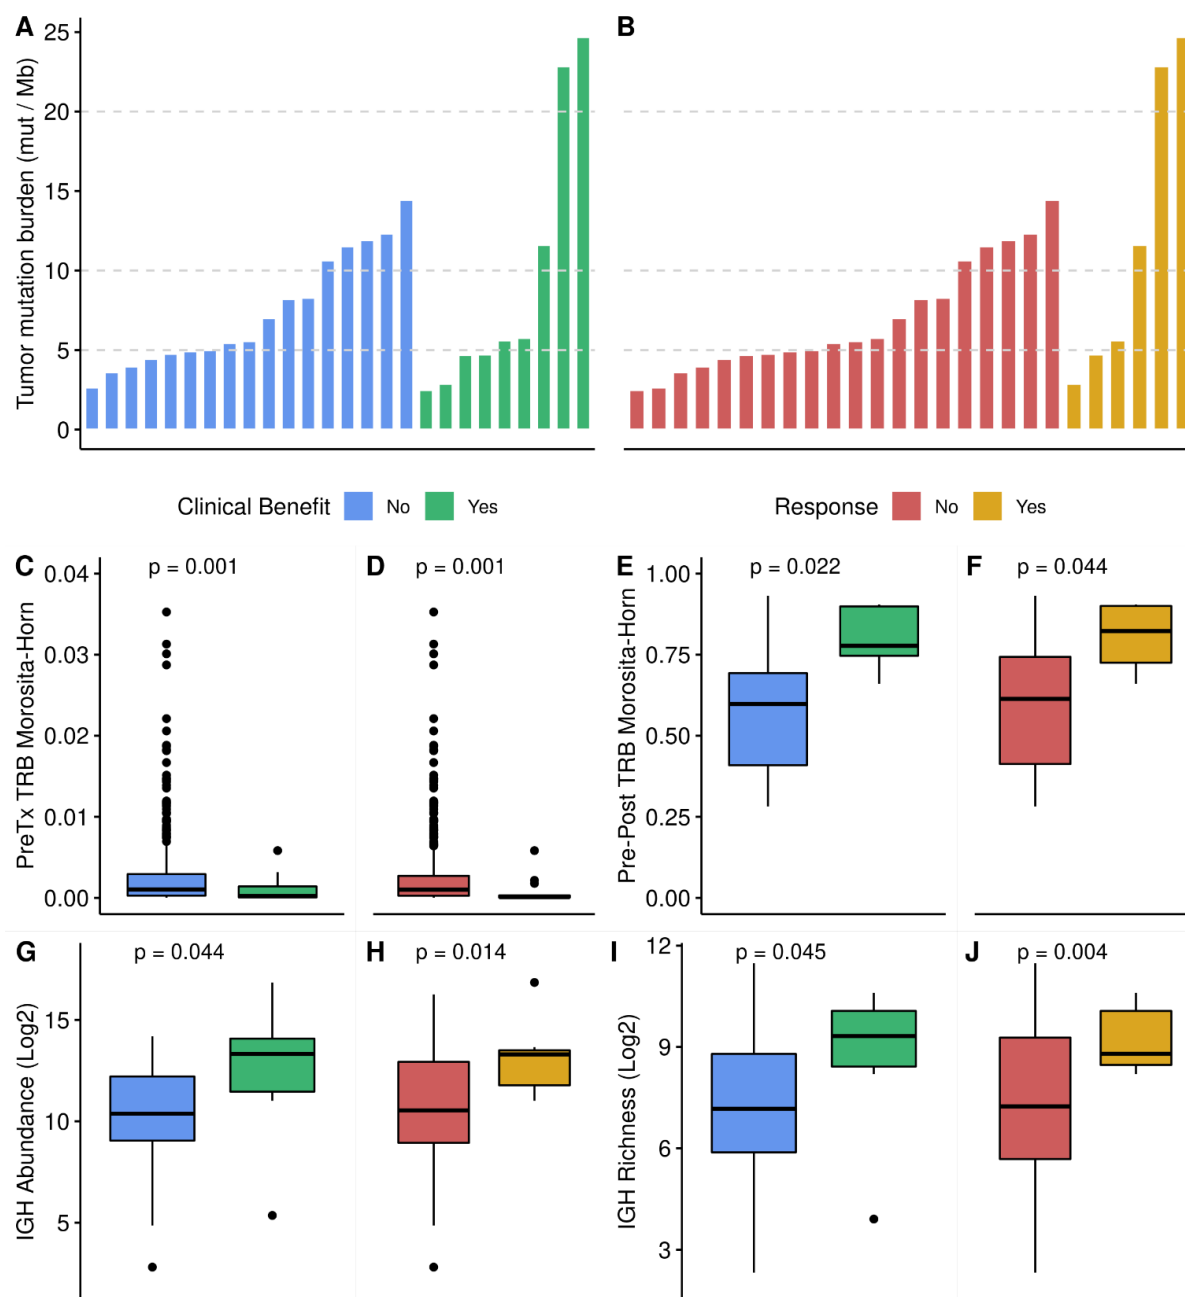

### Supplementary Figure 4: Tumor mutation burden and diversity metrics

A-B: TMB did not significantly differ between groups by clinical benefit (A) or response (B) by either stratification (low <10 mut/Mb, high  $\geq 10$  mut/Mb ; or low: <5 mut/Mb, intermediate: 5-20 mut/Mb, high:  $\geq 20$  mut/Mb; Wilcoxon Rank Sum  $p > 0.29$ ). C-D: Pre-treatment PBMC-derived T-cell beta chain repertoire similarity ( $n=29$ ) was lower ( $p < 0.05$ ) in intra-group comparisons by either future clinical benefit (C) or response (D). E-F: T-cell beta chain repertoire similarity ( $n=15$ ) was higher comparing pre and post treatment samples in patients with either clinical benefit (E) or response (F). G-J: Higher IgH chain abundance and richness was associated ( $p < 0.05$ ) with both clinical benefit (G, I) and response (H, J) in tumor RNA-Seq ( $n=31$ ).

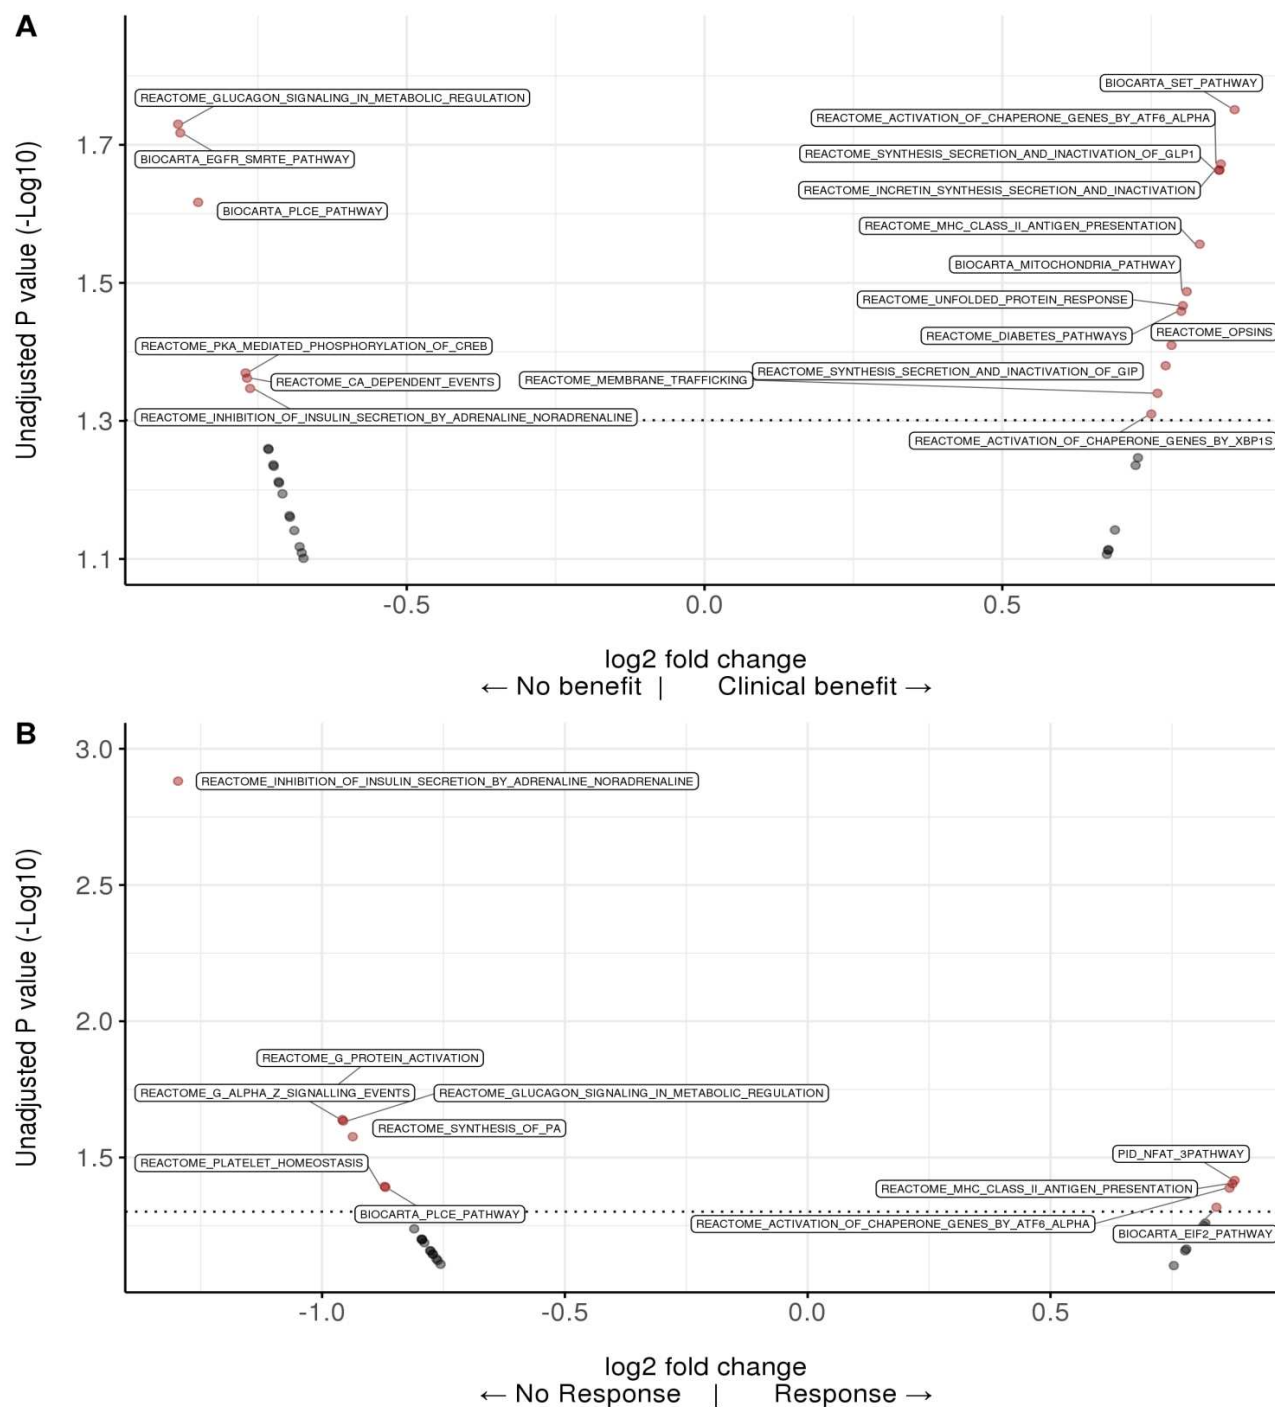

### Supplementary Figure 5: Gene set enrichment

No gene sets were significant by FDR testing in all tumor samples (n=31) by either clinical benefit (A) or response (B). Note the p-value scales have been adjusted to make labels visible in this graphic.

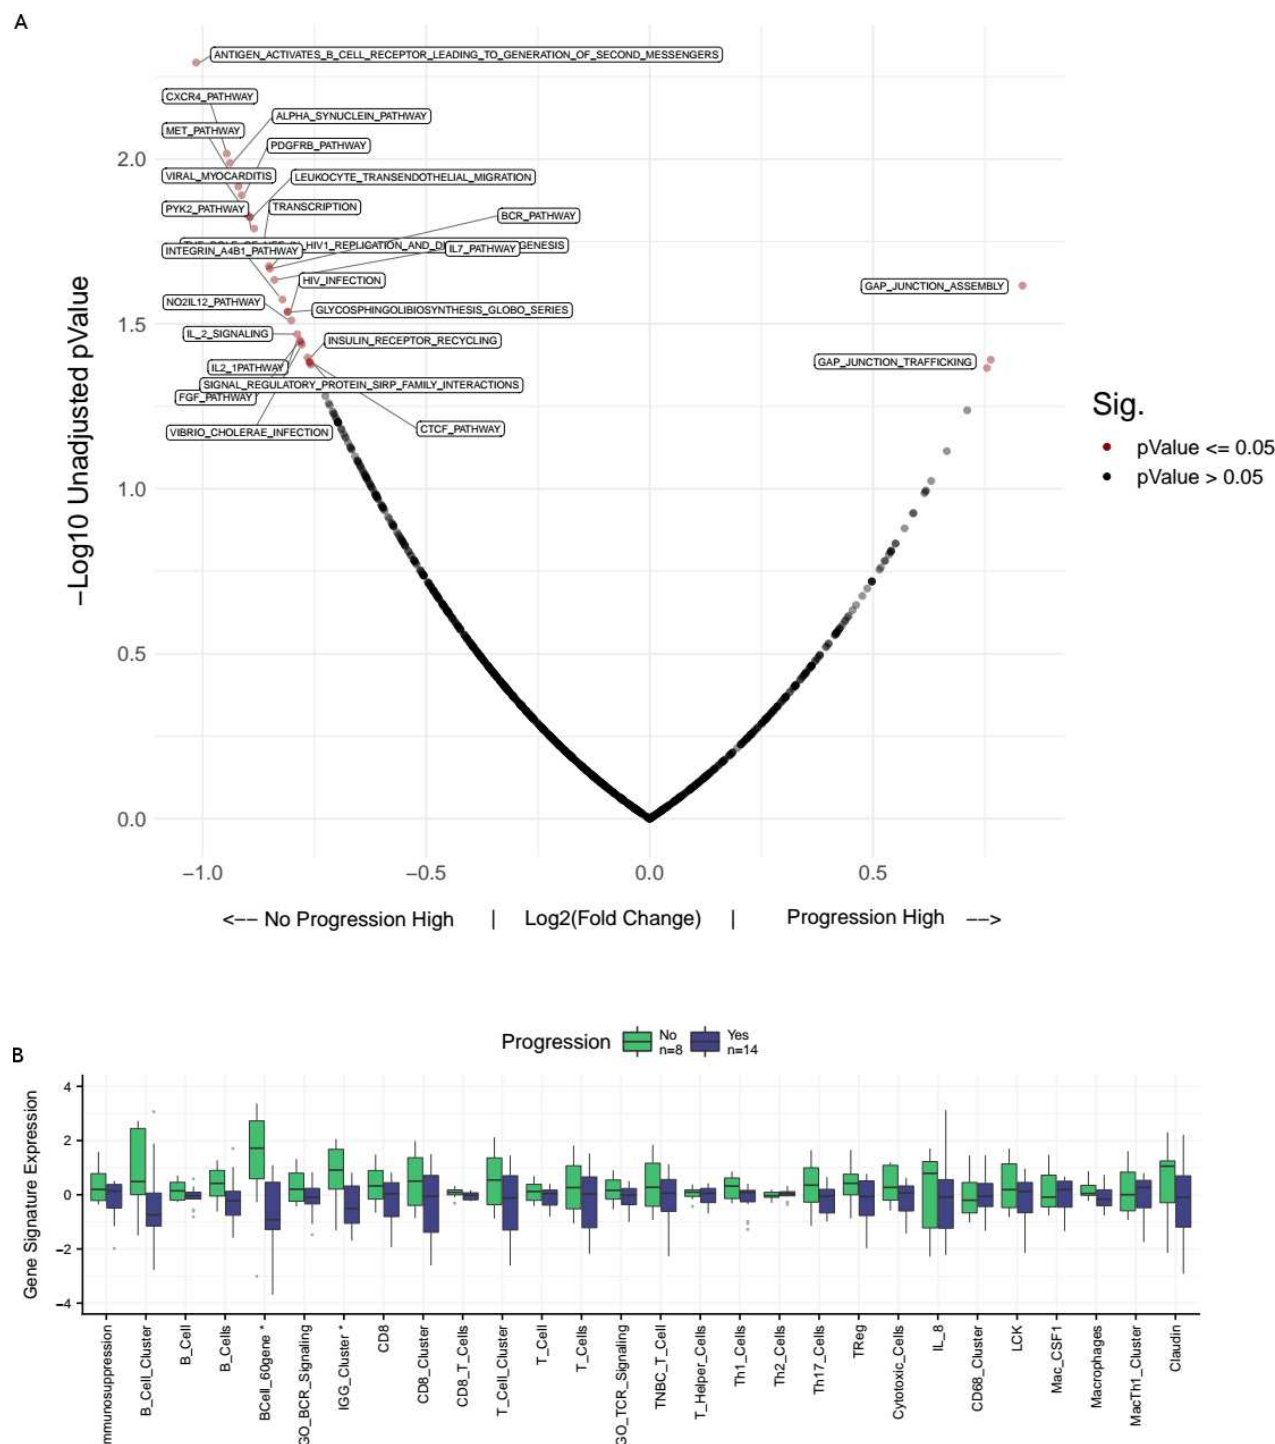

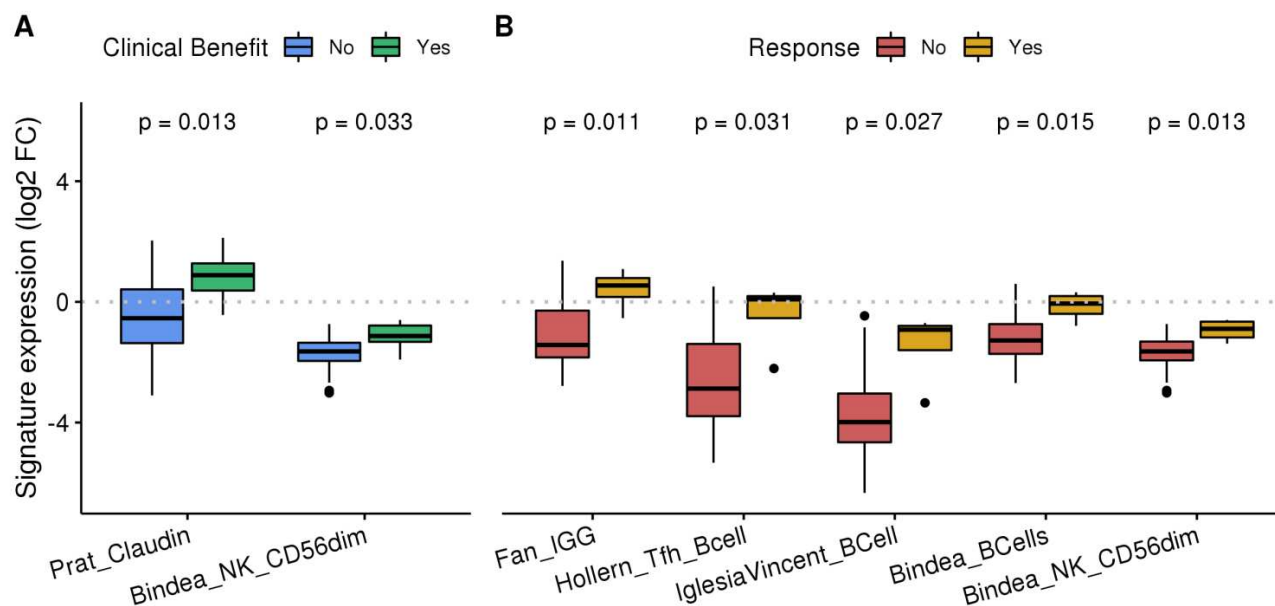

### Supplemental Figure 7: Immune gene features in non-nodal tumor samples

A-B: Immune gene signatures associated ( $p < 0.05$ ) with clinical benefit (CR+PR+SD; A) and response (CR+PR; B) were enhanced after excluding nodal tissue samples.

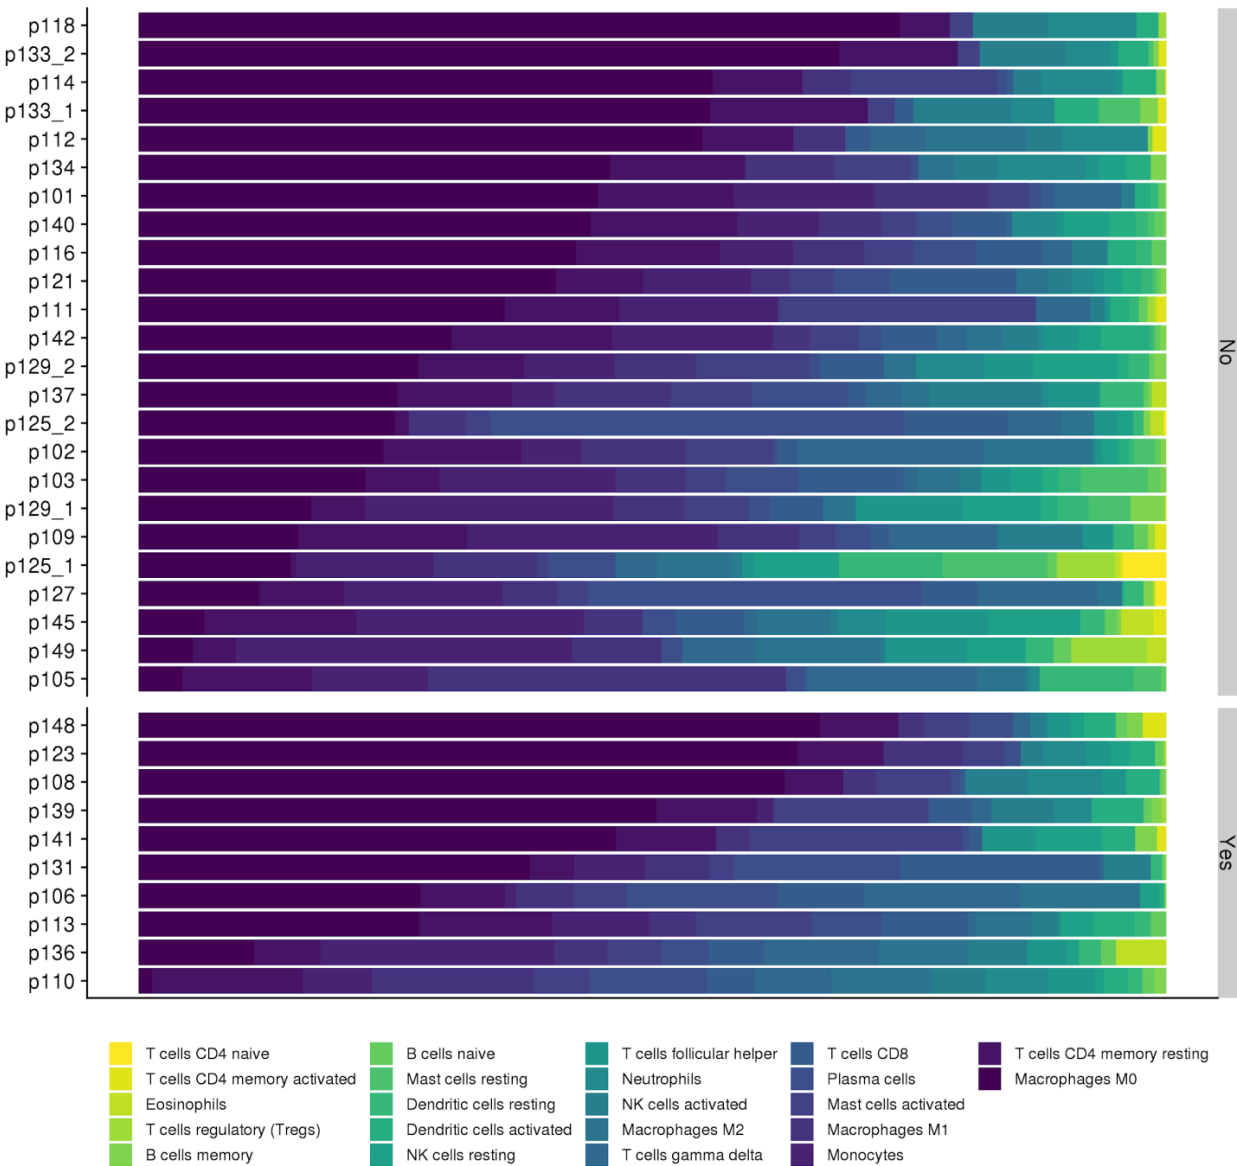

**Supplementary Figure 8: Imputed tumor immune cell mixture.**

Samples sorted by response status. There were no significant differences in imputed immune cell fractions by response or clinical benefit (two-tailed T-test).



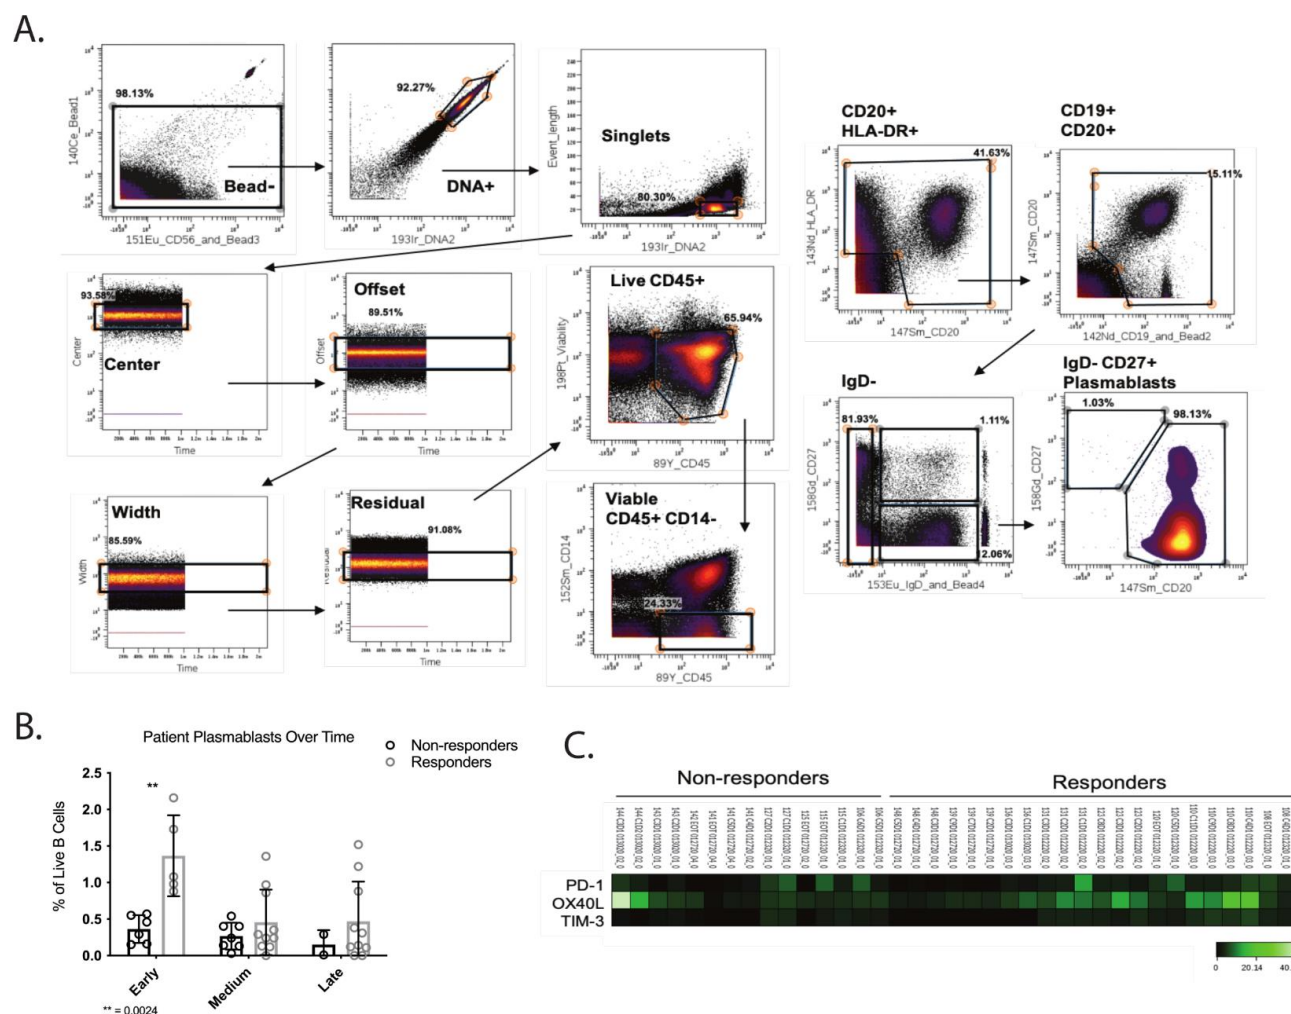

### Supplementary Figure 9: CyTOF of peripheral plasmablasts.

Patients whose metastatic TNBC responded to a priming dose of cyclophosphamide prior to pembrolizumab exhibit an increased frequency of plasmablasts in the peripheral blood early during treatment (cycles 1-2). A: Gating strategy used to eliminate metal-spiked beads, doublets, dead cell debris, CD45- cells and CD45+ monocytes. B: The gating strategy described in (A) was further used to identify additional hematopoietic subpopulations of interest, including plasmablasts [HLA-DR (Nd143Di), CD20 (Sm147Di), CD19 (ND124Di), IgD (Eu153Di), and CD27 (Gd158Di)], of peripheral blood plasmablasts in non-responders and responders across early (Cycle 1-2, 6 non-responders, 5 responders), middle (Cycle 3-5, 7 non-responders, 10 responders), or late (Cycle 6+, 2 non-responders, 10 responders) timepoints. An unpaired Student's t-test was used to determine statistical significance,  $p = 0.0024$ . C: Heat map assessment of PD-1, OX40L and TIM-3 expression on IgD- CD217- plasmablasts as gated in B

A.

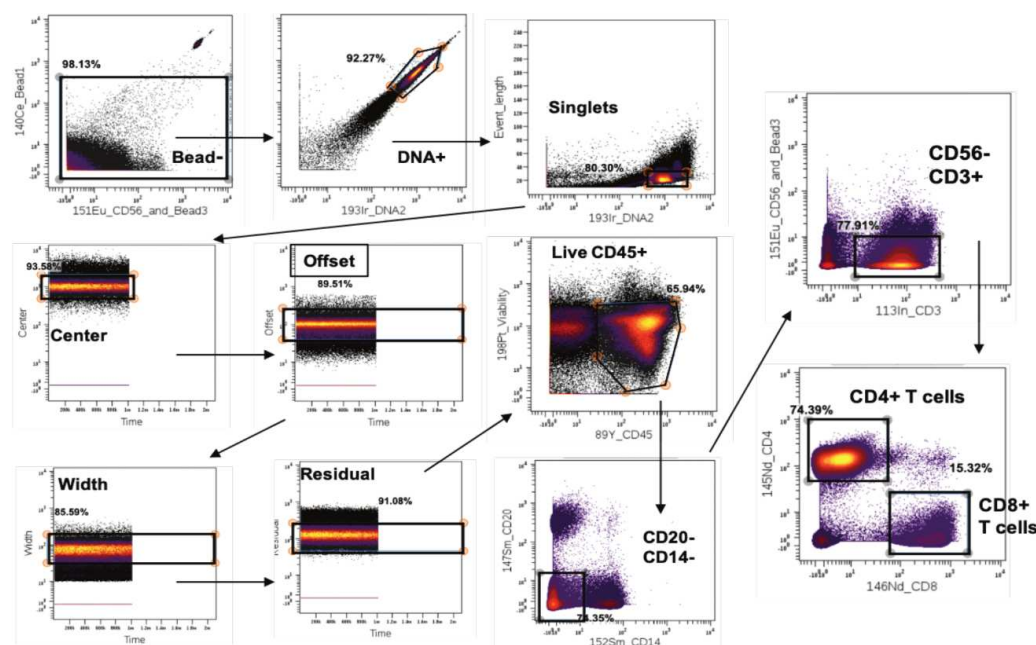

B.

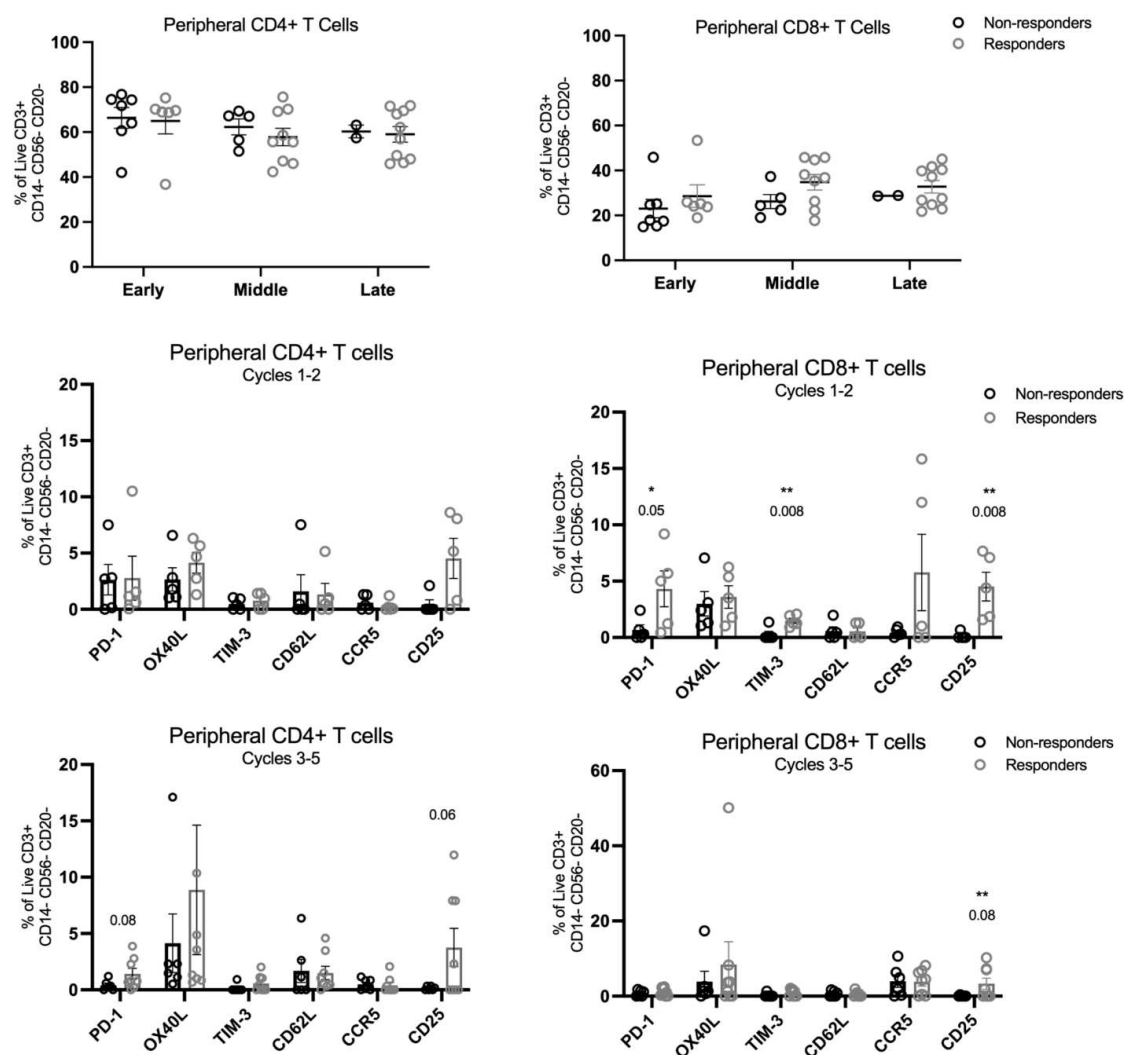

**Supplementary Figure 10: CyTOF of peripheral T-cell subsets**

A: Gating strategy used to eliminate metal-spiked beads, doublets, dead cell debris, CD45- cells, CD20+ / CD14+ monocytes, CD3- and CD4-/CD8- cells. B: The gating strategy described in (A) was further used to identify CD4+ and CD8+ T-cell subsets, shown by treatment timepoint [early (Cycle 1-2, 6 non-responders, 5 responders), middle (Cycle 3-5, 7 non-responders, 10 responders), or late (Cycle 6+, 2 non-responders, 10 responders)] and by expression for early (Cycles 1-2) and middle (Cycles 3-5) timepoints.
